# Supplementary material for: The efficacy and safety of atogepant for the prophylactic treatment of migraine: evidence from randomized controlled trials
Source: PubMed Central journal article supplement (PMC8903713; doi:10.1186/s10194-022-01391-2), 2022-01-29

**A**

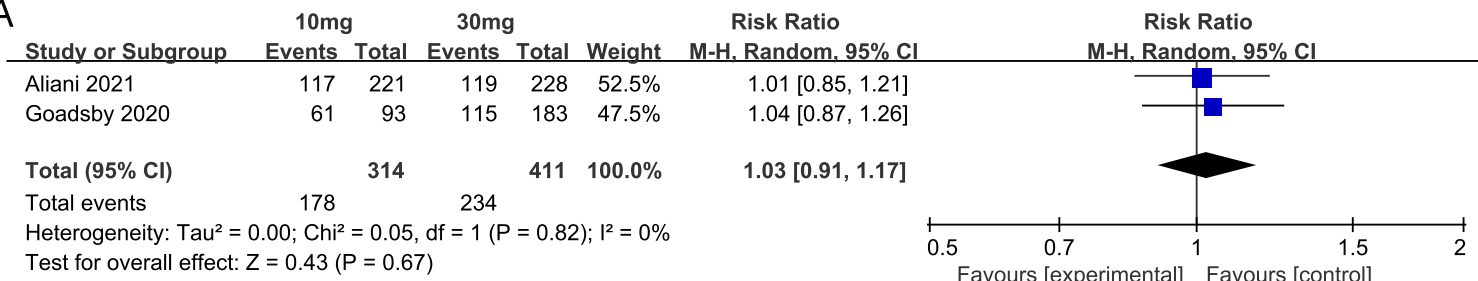

**B**

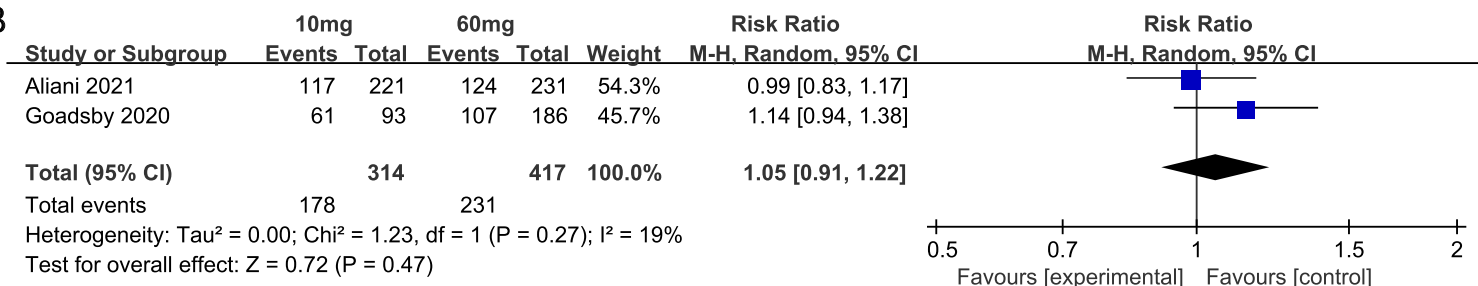

**C**

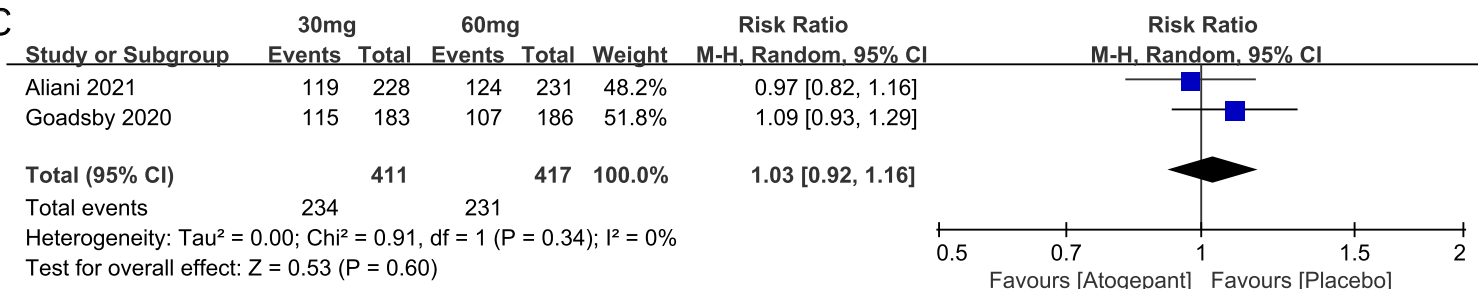

Supplement: 10194_2022_1391_MOESM3_ESM.pdf [file 10194_2022_1391_MOESM3_ESM.pdf]
