# Supplementary material for: The efficacy and safety of atogepant for the prophylactic treatment of migraine: evidence from randomized controlled trials
Source: Springer Nature journal article supplement (doi:10.1186/s10194-022-01391-2), 2022-01-29

A

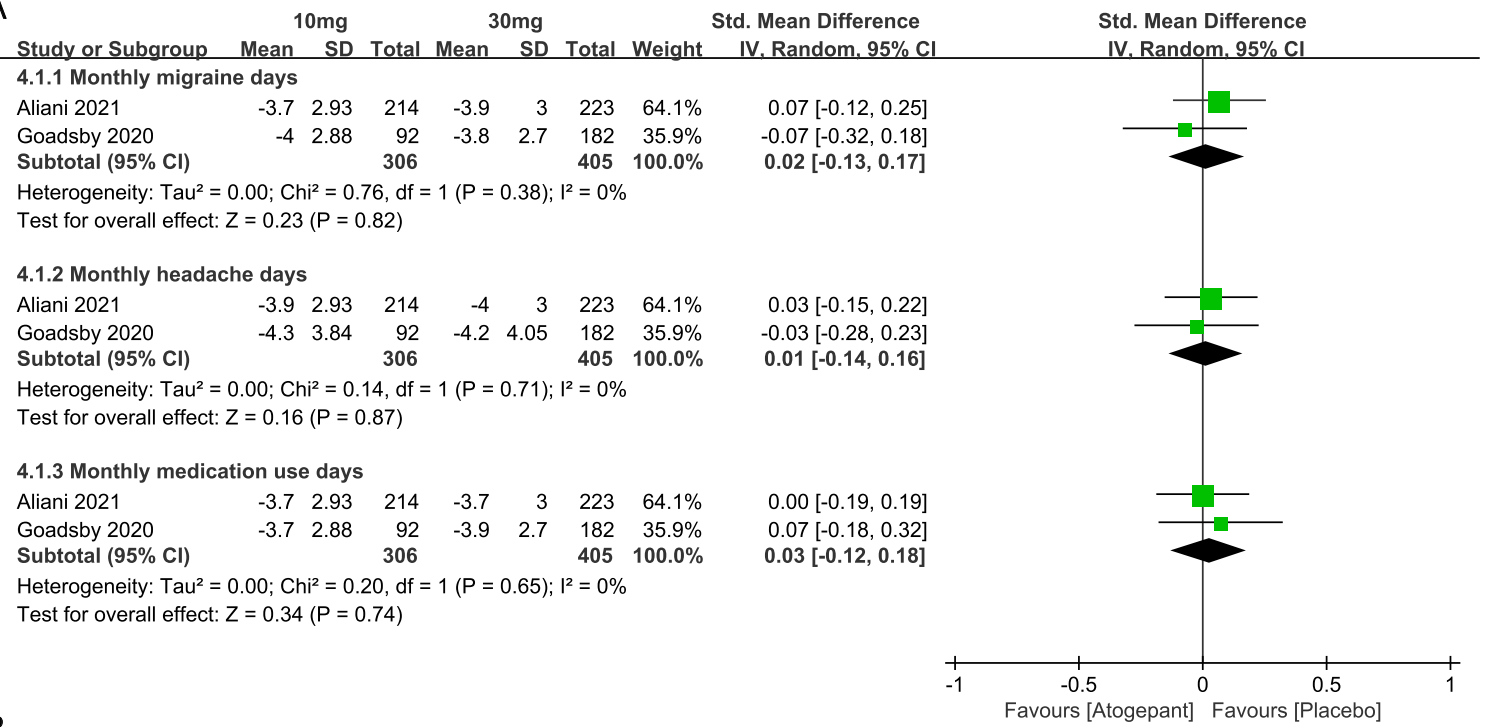

B

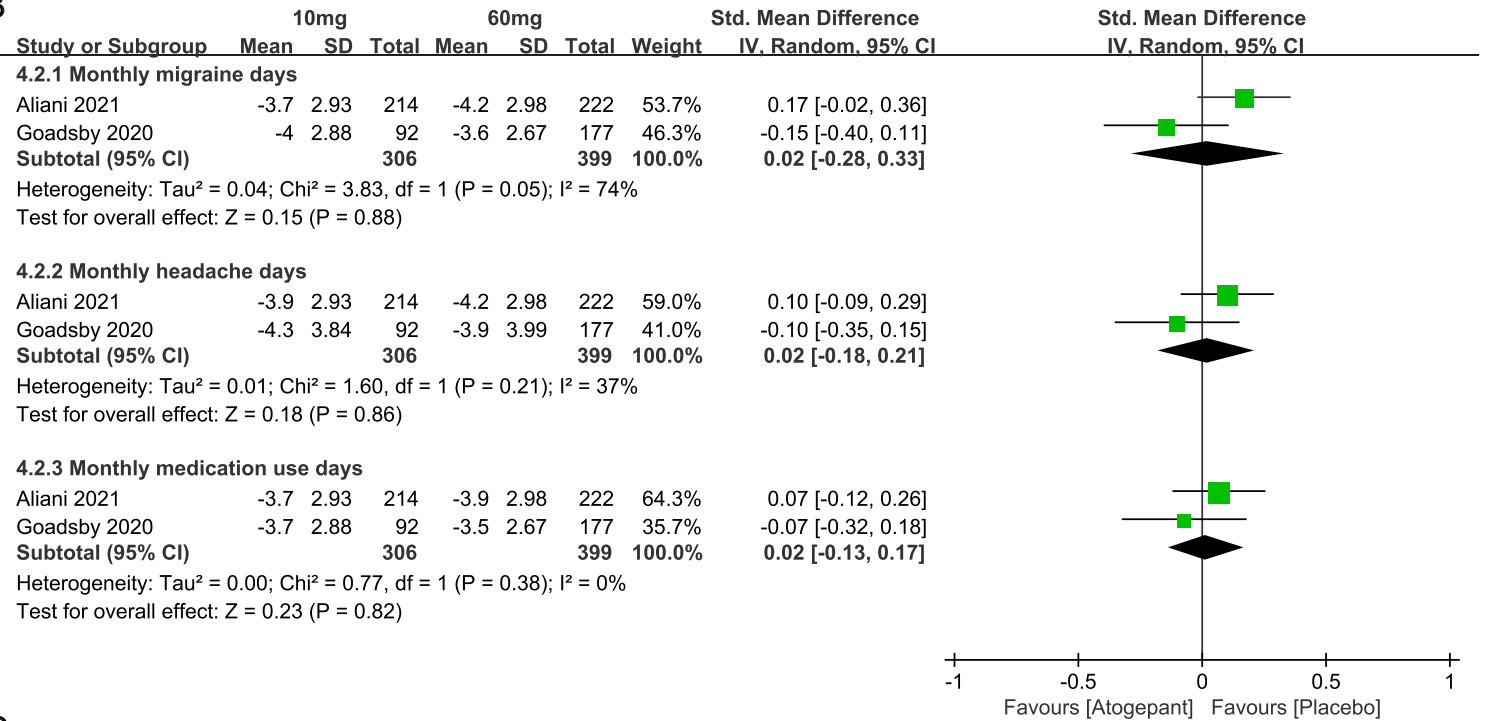

C

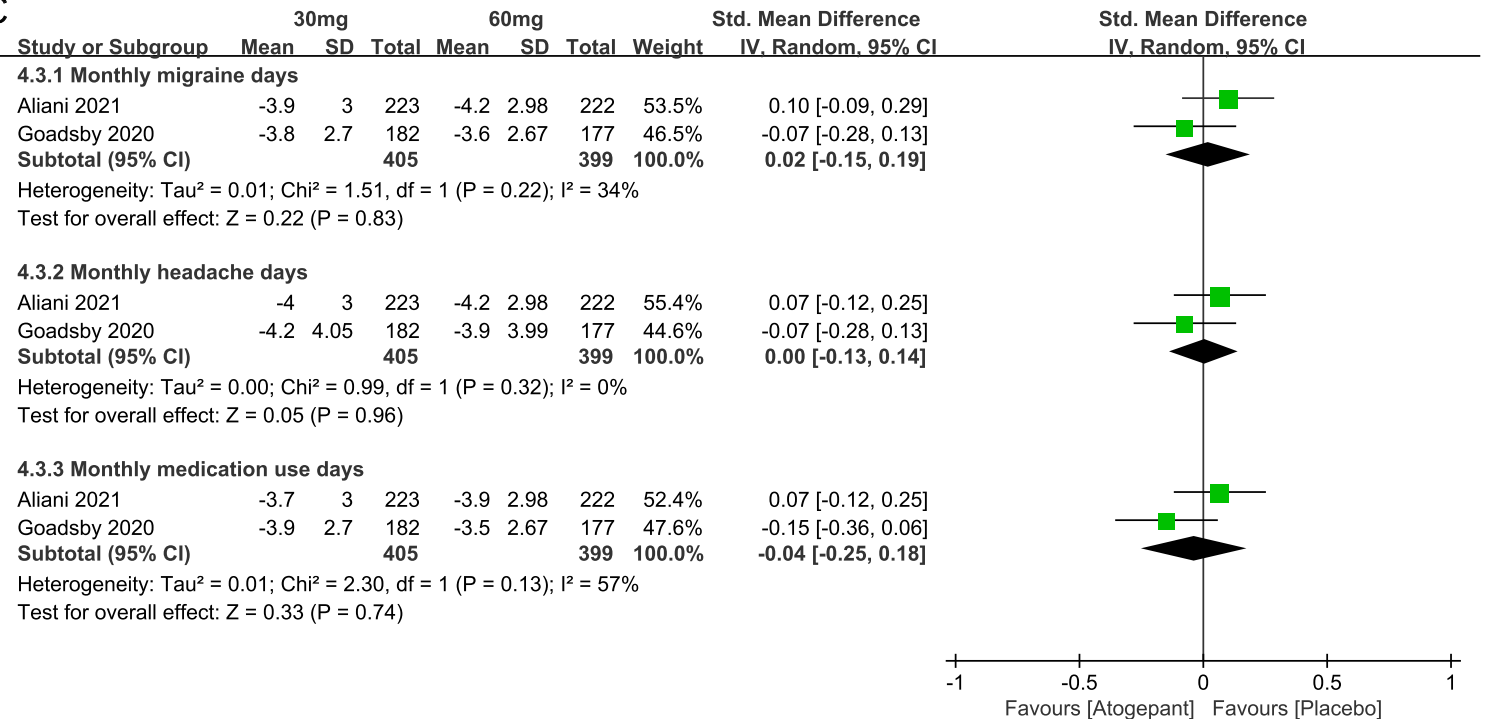

Supplement: MOESM2 [file 20079258]
